## CORRECTION

# Correction: Chondrocytic ephrin B2 promotes cartilage destruction by osteoclasts in endochondral ossification

**Stephen Tonna, Ingrid J. Poulton, Farzin Taykar, Patricia W. M. Ho, Brett Tonkin, Blessing Crimeen-Irwin, Liliana Tatarczuch, Narelle E. McGregor, Eleanor J. Mackie, T. John Martin and Natalie A. Sims**

There was an error published in *Development* **143**, 648-657.

In the Materials and Methods section the murine *Efnb2* gene mutation was incorrectly listed as *Efnb2<sup>tm1And</sup>*. The correct annotation for the floxed allele that we used in our experiments is *Efnb2<sup>tm2And</sup>*. This was a nomenclature error and does not affect the results or conclusions of the paper.

We thank Monika Tomczuk, scientific curator of Mouse Genome Informatics at The Jackson Laboratory, for alerting us to this mistake.

We apologise for any confusion that this error may have caused.
